# Supplementary material
Source: publisher figshare collection journal article supplement (https://tandf.figshare.com/ndownloader/files/12248366)
Supplement: Supplementary file 1 [file 12248366]

**APPENDIX**

**App-Table 1. Inclusion criteria**

| **Condition** | **ICD-9-CM Codes** |
| --- | --- |
| MI (for inclusion criteria and primary outcome) | 410.xx (excluding 410.x2) |

**App-Table 2. Risk factors used in cohort assignment**

| **Condition** | **ICD-9-CM Codes** | **GPI** | **ICD-9 proc** | **CPT** | **UB92-Rev** |
| --- | --- | --- | --- | --- | --- |
| MI | 410.xx, 412.xx |  |  |  |  |
| Stroke | 430.xx, 431.xx, 433.x1, 434.x1, 436.xx |  |  |  |  |
| Diabetes mellitus | 250.xx | 27 |  |  |  |
| Chronic non end-stage renal dysfunction | 405.01, 405.11, 405.91, 584.xx, 585.1x - 585.5x, 585.9x, 586.xx, 588.xx, 753.0x, 753.1x, 791.0x, V45.1x, V56.xx |  | 39.27, 39.42, 39.43, 39.53, 39.93, 39.94, 39.95, 54.98,  55.4, 55.6 | 36800 - 36815,  50300 - 50380,  90920 - 90925,  90935 - 90937,  90945 - 90947,  90989 - 90993,  90997, 90999 | 800-809, 820-889 |

**App-Table 3. Primary outcome**

| **Condition** | **ICD-9-CM Codes** |
| --- | --- |
| Myocardial infarction (MI) | 410.xx (excluding 410.x2) |
| Stroke | 430.xx, 431.xx, 433.x1, 434.x1, 436.xx |

**App-Table 4. Codes for cardiovascular related events**

| **Established CVD Events** | **ICD-9-CM Codes** | **ICD-9 proc** | **CPT** | **HCPCS** |
| --- | --- | --- | --- | --- |
| Myocardial infarction | 410.xx, 412.xx |  |  |  |
| Stroke | 430.xx, 431.xx, 433.x1, 434.xx (excl. 434.x0), 436.xx |  |  |  |
| TIA and other cerebrovascular disease (including prior disease) [does not include stroke] | 432.xx, 433.x0, 434.x0, 435.xx, 437.xx, 438.xx, V12.54 |  |  |  |
| Unstable angina | 411.1x |  |  |  |
| Angina pectoris | 413.xx |  |  |  |
| Congestive heart failure | 402.x1, 404.x1, 404.x3, 428.xx |  |  |  |
| Peripheral vascular disease | 440.xx, 443.9x | 38.13, 38.18, 39.25, 39.26, 39.29, 39.50, 39.90 | 34101 - 34111, 34201 - 34203, 35311 - 35381, 35454 - 35456, 35459, 35470, 35473 - 35474, 35482 - 35485, 35492 - 35495, 35533, 35541 - 35571, 35641, 35646, 35654, 75962 - 75964, 75992 - 75993, 93668 |  |
| Other coronary heart disease | 411.xx (excl. 411.1x), 414.xx, 441.xx, | 36.01 - 36.09, 36.1, 36.2, 38.12, | 33510 - 33516, 33517 - 33545, 33572, 35301, 35390, 92975, 92980 - 92981, 92982 - 92984, 92995 - 92996 |  |
| Revascularization  (Percutaneous coronary intervention, PCI) |  |  |  |  |
| Primary coronary angioplasty without stent |  | 00.66, 36.09 | 92982, 92984, 92995, 92996 |  |
| Drug eluting stent (DES) |  | 36.07 |  | C1874, C1875 |
| Bare metal stent (BMS) |  | 36.06 |  | C1876, C1877 |
| Stent (unspecified type)* |  |  | 92980, 92981 | G0290, G0291 |
| CABG |  | 36.1x – 36.2x | 33510-33516, 33517-33523, 33530, 33533-33536 | S2205-S2209 |

**Index MI event**

≥12 months

pre-index MI period

Post-MI survivor follow-up period

**Study index date**

12 months

MI-free period

**Appendix Figure 1: Timeline for definition of post-MI and study inclusion**

Definition of the pre-index period, MI-free period, and post-MI follow-up periods

MI: myocardial infarction

**Appendix Figure 2: All-cause healthcare cost trends prior to and following index MI hospitalization**

Average all-cause healthcare costs per-patient for the 12 months prior to the index MI, the index MI plus the one year following the MI, and the first three years of follow-up where follow-up begins one year after discharge from the index MI, for those with no selected risk factors (dark grey) and those with at least one selected risk factor (light grey).

Selected risk factors include diabetes, history of MI prior to the index MI, or chronic non-end stage renal disease.

MI, myocardial infarction; CV, cardiovascular; Event-free means the absence of stroke and MI

**Appendix Figure 3: All-cause healthcare cost trends prior to and following index MI hospitalization**

Average all-cause healthcare costs per-patient for the 12 months prior to the index MI, the index MI plus the one year following the MI, and the first three years of follow-up where follow-up begins one year after discharge from the index MI, for those with an additional MI prior to the index event (solid dark grey line), those with diabetes prior to the index MI (solid light grey line), and those with chronic non-end stage renal disease (CNESRD) prior to the index MI (dashed line).

MI, myocardial infarction; CV, cardiovascular; CNESRD, chronic non-end stage renal disease; Event-free means the absence of stroke and MI

**Appendix Figure 4: CV-related healthcare costs prior to and following index MI hospitalization for each risk factor subgroup**

Average cardiovascular related healthcare costs per-patient for the 12 months prior to the index MI, the index MI plus the one year following the MI, and the first three years of follow-up where follow-up begins one year after discharge from the index MI, for those with an additional MI prior to the index event (solid dark grey line), those with diabetes prior to the index MI (solid light grey line), and those with chronic non-end stage renal disease (CNESRD) prior to the index MI (dashed line).

MI, myocardial infarction; CV, cardiovascular; CNESRD, chronic non-end stage renal disease; Event-free means the absence of stroke and MI.
